# Supplementary material
Source: MDPI journal article supplement (https://www.mdpi.com/1424-8247/15/6/654)

**Table S1:** Interaction analysis of docked complexes

| MTOR                                                                                                        |                                                                                                                      |
|-------------------------------------------------------------------------------------------------------------|----------------------------------------------------------------------------------------------------------------------|
| <p><b>Fumaridine</b></p> 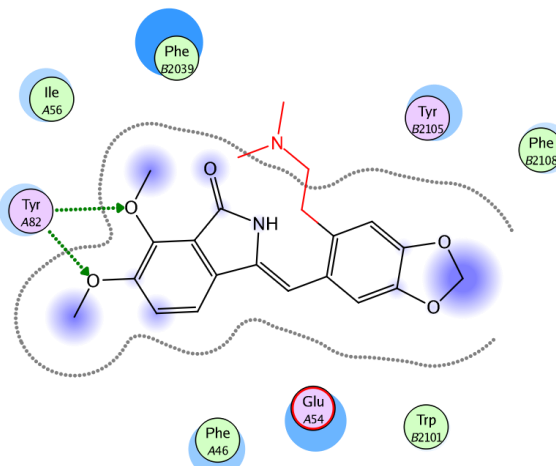  | <p><b>N-feruloyl tyramine</b></p>  |
| <p><b>Cryptopine</b></p>  | <p><b>Lastourvilline</b></p>      |
| MAPK3                                                                                                       |                                                                                                                      |
| <p><b>Fumaridine</b></p>                                                                                    | <p><b>N-feruloyl tyramine</b></p>                                                                                    |

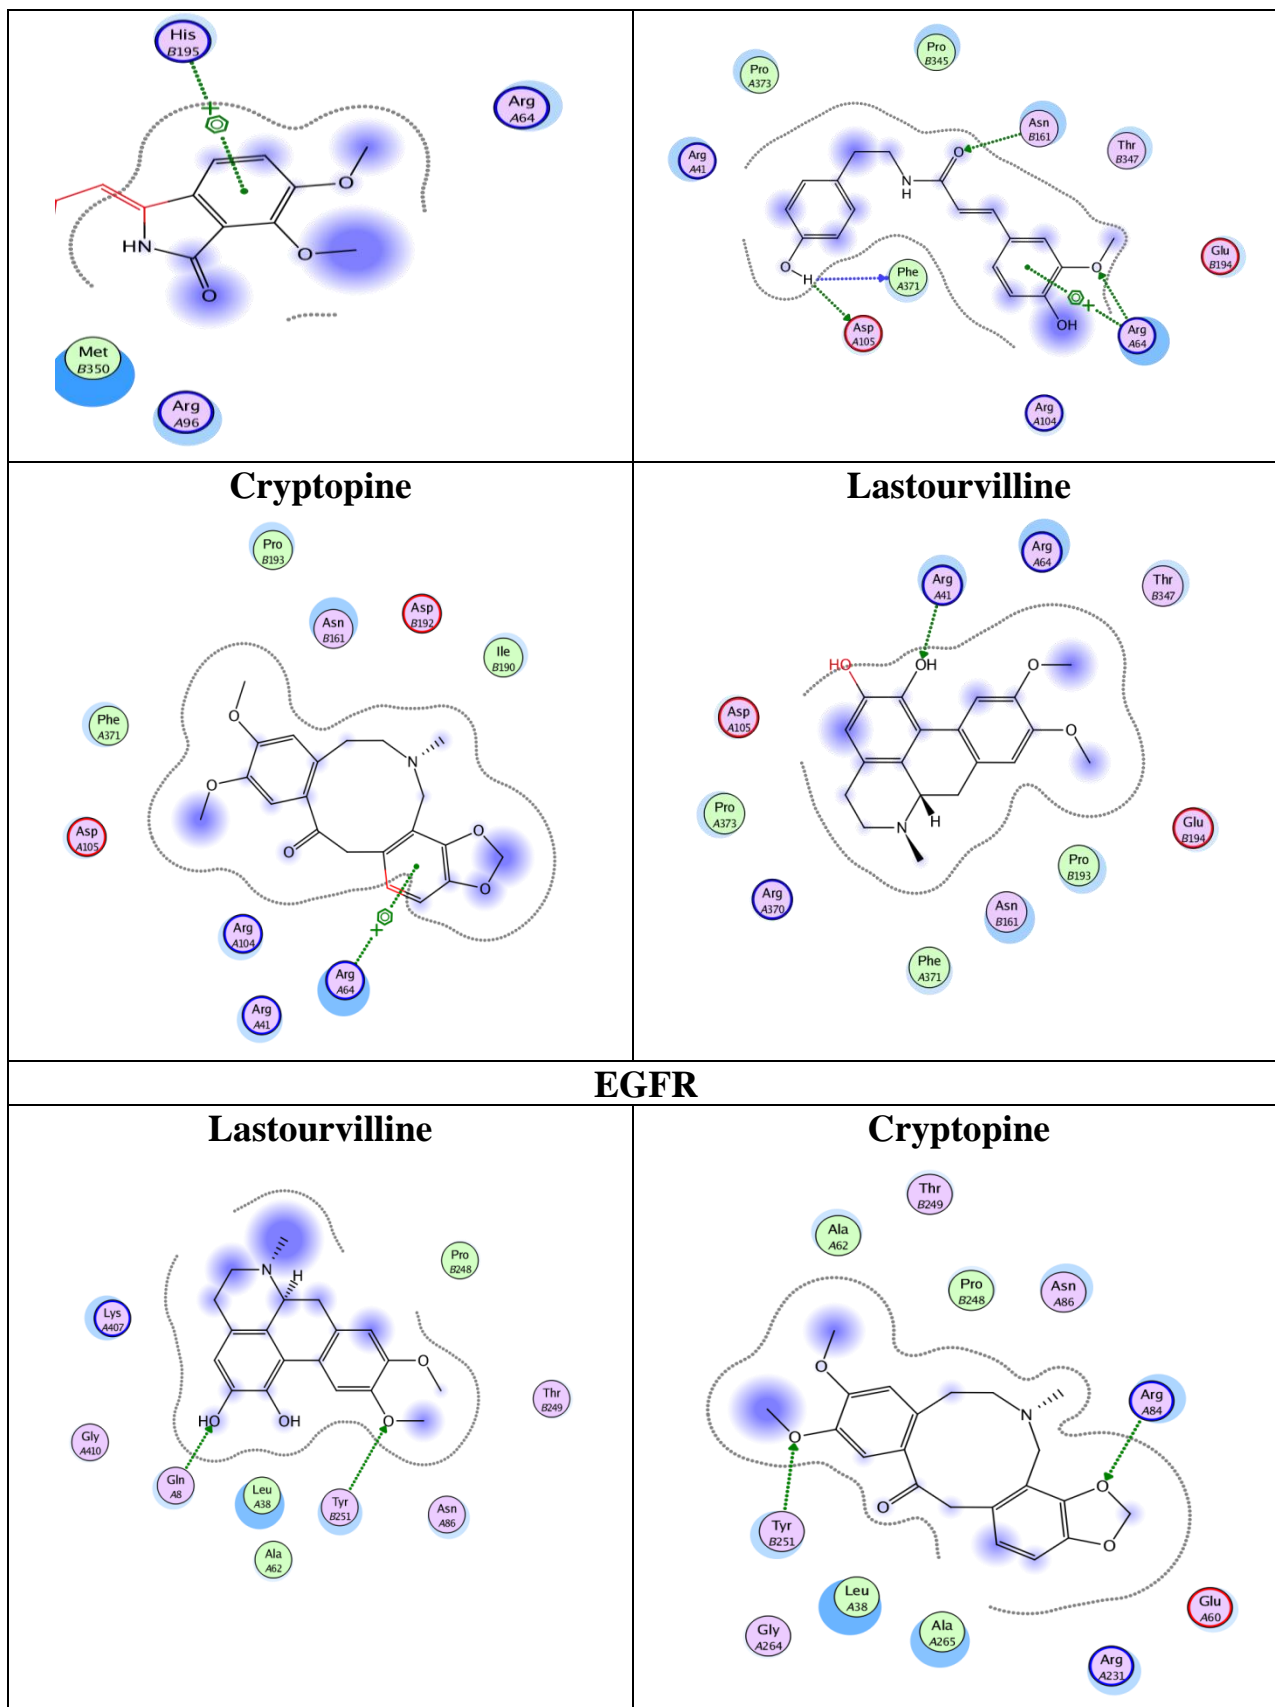

### Fumaridine

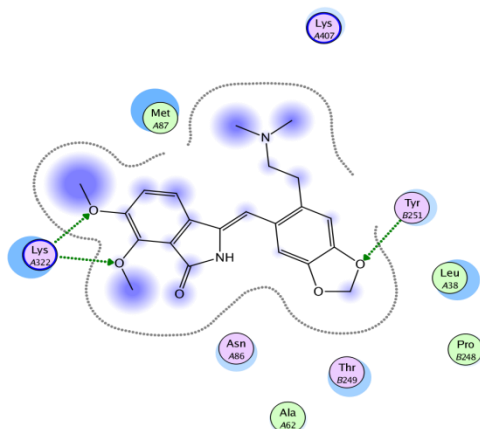

### N-feruloyl tyramine

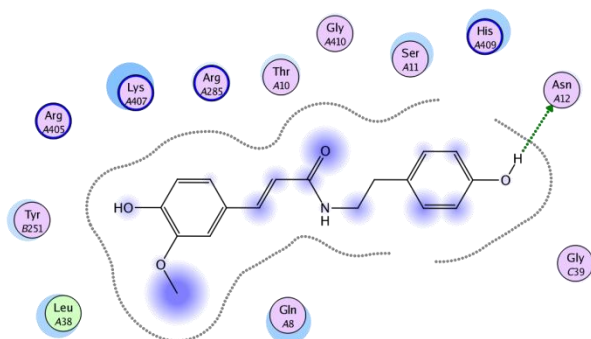

## PIK3R1

### Fumaridine

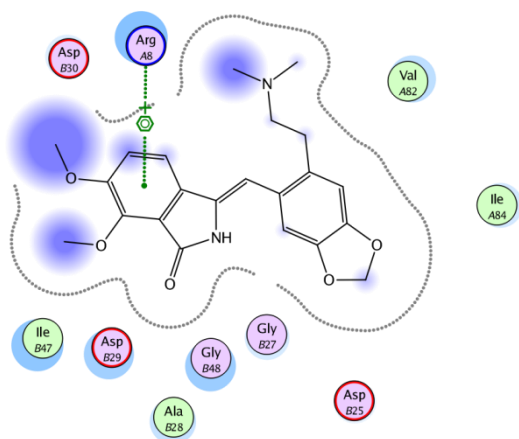

### N-feruloyl tyramine

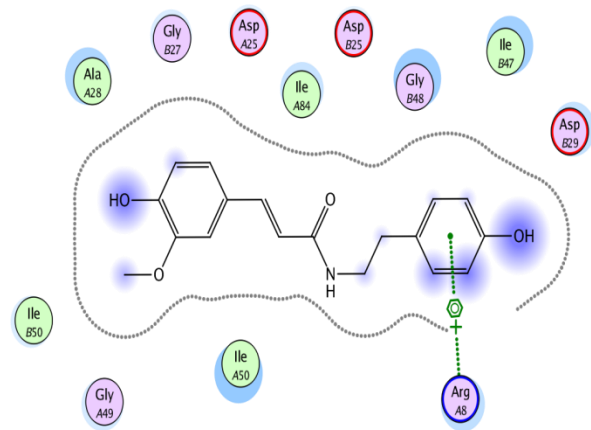

### Cryptopine

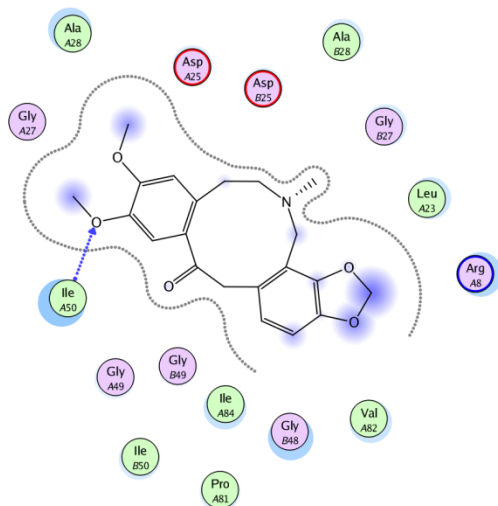

### Lastourvilline

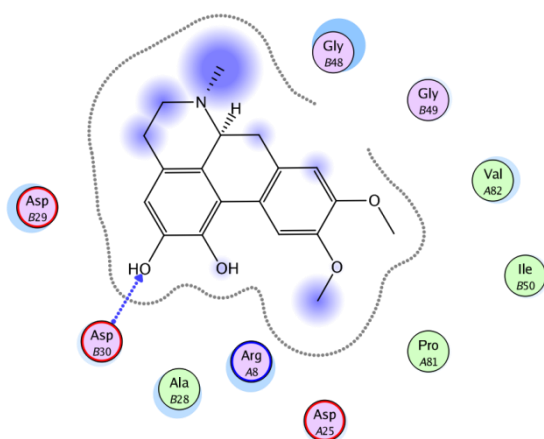

Supplement: s1 [file s1]
